# Supplementary material for: Biomimetic catalysts of iron-based metal–organic frameworks with high peroxidase-mimicking activity for colorimetric biosensing
Source: Royal Society of Chemistry journal article supplement (doi:10.1039/d0dt02504f), 2021-01-01
Supplement: d0dt02504f1.pdf [file d0dt02504f1.pdf]

## Supporting Information

### **Biomimetic Catalysts of Iron-based Metal-Organic Frameworks with High Peroxidase-Mimicking Activity for Colorimetric Biosensing**

Xiaoning Wang<sup>a</sup>, Yumeng Zhao<sup>b</sup>, Jialuo Li<sup>c</sup>, Jiandong Pang<sup>c</sup>, Qiang Wang<sup>a</sup>, Bao Li<sup>\*b</sup> and Hong-Cai Zhou<sup>\*c</sup>

<sup>a</sup> Hubei Key Laboratory of Biomass Fibers and Eco-dyeing & Finishing, *College of Chemistry and Chemical Engineering, Wuhan Textile University, Wuhan, Hubei, 430073, PR China.*

<sup>b</sup> *Key Laboratory of Material Chemistry for Energy Conversion and Storage, School of Chemistry and Chemical Engineering, Huazhong University of Science and Technology, Wuhan, Hubei, 430074, PR China.*

<sup>c</sup> *Department of Chemistry, Texas A&M University, College Station, Texas 77843-3255, United States.*

\*E-mails: libao@hust.edu.cn; zhou@chem.tamu.edu

## Content

|      |                                                                                             |    |
|------|---------------------------------------------------------------------------------------------|----|
| S1.  | Materials and General Methods.....                                                          | 3  |
| S2.  | Syntheses.....                                                                              | 3  |
| S3.  | X-Ray Structural Determination .....                                                        | 4  |
| S4.  | N <sub>2</sub> Sorption Measurements .....                                                  | 4  |
| S5.  | Computational Detail.....                                                                   | 4  |
| S6.  | Crystal Data .....                                                                          | 6  |
| S7.  | The Crystal Images of HUST-5 and HUST-7 .....                                               | 7  |
| S8.  | The Crystal Structure of HUST-5 and HUST-7 .....                                            | 7  |
| S9.  | TGA Curves of HUST-5 and HUST-7.....                                                        | 9  |
| S10. | Powder X-ray Diffraction .....                                                              | 11 |
| S11. | Catalytic Activity Test and H <sub>2</sub> O <sub>2</sub> and AA Detection Procedures ..... | 12 |

## S1. Materials and General Methods

The organic ligand H<sub>6</sub>L and other reagents for the syntheses were of analytical grade and used as received from commercial sources without further purification. Elemental analyses for C, H, and N were performed on a Perkin-Elmer 2400 elemental analyzer. The IR spectra were recorded with KBr pellets on a Nicolet Avatar-360 spectrometer in the 4000–400 cm<sup>-1</sup> region. Powder X-ray diffraction (PXRD) was carried out on a Bruker D8-Focus Bragg-Brentano X-ray Powder Diffractometer equipped with a Cu sealed tube ( $\lambda = 1.54178 \text{ \AA}$ ) at 40 kV and 40 mA. Thermogravimetry analysis (TGA) was conducted on a TGA-50 thermogravimetric analyzer. Diffraction was measured on a Bruker Venture CMOS diffractometer equipped with a Cu-K $\alpha$  sealed-tube X-ray source ( $\lambda = 1.54178 \text{ \AA}$ ) at 100 K. The N<sub>2</sub> sorption measurements were conducted using a Micromeritics ASAP 2020 system. Ultraviolet-visible (UV-vis) adsorption spectra of the samples were recorded on UV-3600 spectrophotometer.

## S2. Syntheses

**S2.1 Synthesis of HUST-5.** The crystal sample HUST-5 was synthesized according to our previous work with little modification as follows<sup>[1]</sup>: FeCl<sub>2</sub>·4H<sub>2</sub>O (0.18 mmol, 36 mg) and H<sub>6</sub>L (0.042 mmol, 40 mg) were ultrasonically dissolved in 12 mL DMF and 1 mL H<sub>2</sub>O, and formic acid (1.6 mL) was then added to the solution in a 20 mL glass vial. The vial was then heated at 120 °C for 5 days in an oven. After cooling to room temperature, the red block crystals were harvested by filtration and washed with DMF. The yield was 48% for HUST-5 (based on H<sub>6</sub>L ligand). IR (KBr, cm<sup>-1</sup>): 3422 (m, br), 3072 (w), 2928 (w), 1658 (m), 1598 (vs), 1549 (m), 1410 (vs), 1266 (m), 1206 (s), 1153 (vs), 1018 (w), 950 (s), 887 (m), 788 (s), 697 (m), 617 (m), 478 (m).

Elemental analysis calcd (%) for HUST-5 ( $C_{85}H_{57}Fe_6N_6O_{44}P_6$ ): C 42.76, H 2.41, N 3.52; Found: C 43.40, H 2.85, N 4.06.

**S2.2 Synthesis of HUST-7.**  $FeCl_2 \cdot 4H_2O$  (0.18 mmol, 36 mg) and  $H_6L$  (0.042 mmol, 40 mg) were ultrasonically dissolved in 12 mL DMF and 1 mL  $H_2O$ , and acetic acid (1.6 mL) was then added to the solution in a 20 mL glass vial. The vial was then heated at 120 °C for 5 days in an oven. After cooling to room temperature, the red plate shaped crystals were harvested by filtration and washed with DMF. The yield was 43% for HUST-7 (based on  $H_6L$  ligand). IR (KBr,  $cm^{-1}$ ): 3425 (m, br), 3077 (w), 2926 (w), 1670 (s), 1607 (s), 1564 (m), 1409 (vs), 1272 (m), 1200 (s), 1158 (vs), 1099 (m), 1012 (m), 940 (s), 889 (m), 783 (m), 734 (m), 697 (m), 619 (m), 469 (m).

Elemental analysis calcd (%) for HUST-7 ( $C_{42}H_{28}Fe_3N_3O_{22}P_3$ ): C 42.49, H 2.37, N 3.54; Found: C 43.28, H 2.97, N 4.10.

### S3. X-Ray Structural Determination

Diffraction data for HUST-7 has been collected via Bruker Venture using Cu- $K\alpha$  ( $\lambda = 1.54178 \text{ \AA}$ ) radiation at 100 K. The structures of complexes were solved by direct methods, and the non-hydrogen atoms were located from the trial structure and then refined anisotropically with SHELXTL using a full-matrix leastsquares procedure based on  $F^2$  values. The hydrogen atom positions were fixed geometrically at calculated distances and allowed to ride on the parent atoms. Attempts to define the highly disordered solvent molecules were unsuccessful, so the structure was refined with the PLATON "SQUEEZE" procedure. After the calculation of TGA and SQUEEZE, the whole formula of HUST-7 should be  $C_{42}H_{30}Fe_3N_3O_{22}P_3 \cdot 4H_2O \cdot 5C_3H_7NO$ . The diffraction intensity of crystal sample was very weak due to the very small size and large porous framework, which must be

responsible for the corresponding alert A. CCDC-1913173, 1954084 for the data under different temperature contain the supplementary crystallographic data for this paper. The data can be obtained free of charge from The Cambridge Crystallographic Data Centre via [http://www.ccdc.cam.ac.uk/data\\_request/cif](http://www.ccdc.cam.ac.uk/data_request/cif) (or from the Cambridge Crystallographic Data Centre, 12 Union Road, Cambridge CB2 1EZ, U.K.). The details for structural analyses of the HUST-5 and HUST-7 were listed in Table S1-3.

#### **S4. N<sub>2</sub> Sorption Measurements**

Before gas sorption experiments, as-synthesized HUST-7 samples were washed with DMF and immersed in acetonitrile for 3 days, during which the solvent was decanted and freshly replenished three times. The solvent was removed under vacuum at 80 °C, yielding porous material. Gas sorption measurements were then conducted using a Micromeritics ASAP 2020 system.

#### **S5. Computational Detail**

Spin polarized DFT calculations were performed by using DMol<sup>3</sup> software in the Material Studio module.<sup>[2]</sup> Exchange-correlation (XC) effects were described by Perdew–Burke–Ernzerhof (PBE) functional with generalized gradient approximation (GGA).<sup>[3]</sup> All electron numerical basis set of double numerical plus polarization (DNP),<sup>[4]</sup> comparable to the 6-31G\*\* Gaussian basis sets and featuring less basis set superposition error (BSSE),<sup>[5]</sup> were used to expand electronic wave function. For Fe, the Effective Core Potentials (ECP)<sup>[6]</sup> replaces core electrons by a single effective potential, and valence electrons were described by DNP numerical basic set. DFT-D corrections with Grimme method<sup>[7]</sup> was used to the treatment of weak dispersion energy. In the optimization calculation,  $1.0 \times 10^{-5}$  Ha and  $1.0 \times 10^{-3}$  Ha. Å<sup>-1</sup> were set as the convergence value of energy and force, and the threshold for SCF density convergence was  $1.0 \times 10^{-6}$ . Adsorption energy were typically calculated based following formula:  $E_a(X) = E(X\text{- MOF}) - E(\text{MOF}) - E(X)$  (X= OPD, THB and TMB), where E(X- MOF), E(MOF) and E(X) were single-point energy of relaxed

geometry of X-MOF, MOF and three reaction species with the same computational setting. Meanwhile, dissociation energy of aqua ligand was evaluated according to this formula:  $E_d = E(\text{H}_2\text{O}) + E(\text{MOF-H}_2\text{O}) - E(\text{MOF})$ , where  $E(\text{MOF})$ ,  $E(\text{MOF-H}_2\text{O})$  and  $E(\text{H}_2\text{O})$  were single-point energy of relaxed structure of original MOF, H<sub>2</sub>O-removed MOF and H<sub>2</sub>O with the same computational setting.

## S6. Crystal Data

**Table S1.** Crystal Data of HUST-7

| HUST-7                                         |                                       |
|------------------------------------------------|---------------------------------------|
| Empirical formula                              | $C_{57}Fe_3H_{73}N_8O_{31}P_3$        |
| Formula weight                                 | 1626.707                              |
| Temperature/K                                  | 100.00                                |
| Crystal system                                 | orthorhombic                          |
| Space group                                    | <i>Pbam</i>                           |
| a/Å                                            | 22.234(4)                             |
| b/Å                                            | 28.096(6)                             |
| c/Å                                            | 28.408(6)                             |
| $\alpha/^\circ$                                | 90                                    |
| $\beta/^\circ$                                 | 90                                    |
| $\gamma/^\circ$                                | 90                                    |
| Volume/Å <sup>3</sup>                          | 17746(6)                              |
| Z                                              | 8                                     |
| $\rho_{\text{calc}}/\text{g}/\text{cm}^3$      | 1.218                                 |
| $\mu/\text{mm}^{-1}$                           | 0.611                                 |
| F(000)                                         | 6751.2                                |
| Crystal size/mm <sup>3</sup>                   | 0.2 × 0.2 × 0.15                      |
| Radiation                                      | Mo K $\alpha$ ( $\lambda = 0.71073$ ) |
| 2 $\Theta$ range for data collection/ $^\circ$ | 2.74 to 44.52                         |

|                                                |                                                        |  |
|------------------------------------------------|--------------------------------------------------------|--|
| Index ranges                                   | $0 \leq h \leq 23, 0 \leq k \leq 29, 0 \leq l \leq 29$ |  |
| Reflections collected                          | 11074                                                  |  |
| Data/restraints/parameters                     | 11074/0/680                                            |  |
| Goodness-of-fit on $F^2$                       | 1.055                                                  |  |
| Final R indexes [ $I \geq 2\sigma(I)$ ]        | $R_1 = 0.0648, wR_2 = 0.1903$                          |  |
| Final R indexes [all data]                     | $R_1 = 0.0684, wR_2 = 0.1961$                          |  |
| Largest diff. peak/hole / $e \text{ \AA}^{-3}$ | 0.55/-0.47                                             |  |

---

**Table S2** Selected Bond Lengths for HUST-5

| Atom | Atom             | Length/ $\text{\AA}$ | Atom | Atom             | Length/ $\text{\AA}$ |
|------|------------------|----------------------|------|------------------|----------------------|
| Fe1  | O2               | 2.060(9)             | O28  | Fe5 <sup>3</sup> | 1.990(9)             |
| Fe1  | O41              | 1.969(10)            | O26  | Fe6 <sup>3</sup> | 2.025(9)             |
| Fe1  | O24              | 1.971(9)             | C60  | C59              | 1.439(11)            |
| Fe1  | O4               | 1.965(10)            | O42  | Fe6              | 2.080(13)            |
| Fe1  | O38              | 1.978(9)             | O30  | Fe6 <sup>4</sup> | 1.936(10)            |
| Fe1  | O7 <sup>1</sup>  | 2.040(11)            | O12  | Fe6 <sup>2</sup> | 1.977(9)             |
| O11  | Fe4 <sup>2</sup> | 2.030(8)             | O23  | Fe3              | 1.984(9)             |
| O8   | Fe2 <sup>2</sup> | 1.976(10)            | O3   | Fe3              | 1.934(10)            |
| O44  | Fe5              | 1.891(11)            | O9   | Fe3 <sup>2</sup> | 2.037(9)             |
| O44  | Fe4              | 1.919(9)             | O6   | Fe3 <sup>5</sup> | 2.010(11)            |
| O44  | Fe6              | 1.935(9)             | Fe2  | O8 <sup>1</sup>  | 1.976(10)            |
| O41  | Fe2              | 1.944(10)            | Fe2  | O10 <sup>1</sup> | 1.968(10)            |



|     |                  |           |     |                  |           |
|-----|------------------|-----------|-----|------------------|-----------|
| O41 | Fe3              | 1.849(10) | Fe2 | O5 <sup>5</sup>  | 2.036(10) |
| O10 | Fe2 <sup>2</sup> | 1.968(10) | Fe3 | O9 <sup>1</sup>  | 2.037(9)  |
| O27 | Fe4 <sup>3</sup> | 1.991(8)  | Fe3 | O6 <sup>5</sup>  | 2.010(11) |
| O22 | Fe5              | 2.008(10) | Fe5 | O29 <sup>6</sup> | 2.043(10) |
| O19 | Fe4              | 2.008(10) | Fe5 | O28 <sup>7</sup> | 1.990(9)  |
| O1  | Fe2              | 1.960(9)  | Fe4 | O11 <sup>1</sup> | 2.030(8)  |
| O29 | Fe5 <sup>4</sup> | 2.043(10) | Fe4 | O27 <sup>7</sup> | 1.991(8)  |
| O25 | Fe4 <sup>3</sup> | 2.051(12) | Fe4 | O25 <sup>7</sup> | 2.051(12) |
| O43 | Fe5              | 2.061(10) | Fe6 | O26 <sup>7</sup> | 2.025(9)  |
| O5  | Fe2 <sup>5</sup> | 2.036(10) | Fe6 | O30 <sup>6</sup> | 1.936(10) |
| O21 | Fe6              | 2.082(9)  | Fe6 | O12 <sup>1</sup> | 1.977(9)  |
| O40 | Fe3              | 2.066(12) | O7  | Fe1 <sup>2</sup> | 2.040(11) |
| O20 | Fe5              | 1.945(10) |     |                  |           |

<sup>1</sup>-1/2+X,1/2+Y,+Z; <sup>2</sup>1/2+X,-1/2+Y,+Z; <sup>3</sup>-1/2+X,-1/2+Y,+Z; <sup>4</sup>5/2-X,-1/2+Y,-Z; <sup>5</sup>3-X,+Y,-1-Z; <sup>6</sup>5/2-X,1/2+Y,-Z;  
<sup>7</sup>1/2+X,1/2+Y,+Z

**Table S3.** Selected Bond Lengths for HUST-7

| Atom | Atom             | Length/Å | Atom | Atom             | Length/Å |
|------|------------------|----------|------|------------------|----------|
| Fe1  | O8 <sup>1</sup>  | 2.124(4) | Fe4  | O23              | 1.896(4) |
| Fe1  | O8               | 2.124(4) | Fe4  | O26              | 2.059(6) |
| Fe1  | O12 <sup>2</sup> | 2.108(4) | Fe5  | O13 <sup>6</sup> | 2.023(4) |
| Fe1  | O12 <sup>3</sup> | 2.108(4) | Fe5  | O13              | 2.023(4) |
| Fe1  | O19              | 1.999(5) | Fe5  | O16 <sup>8</sup> | 2.017(4) |

|     |                  |          |     |                   |          |
|-----|------------------|----------|-----|-------------------|----------|
| Fe1 | O22              | 2.067(8) | Fe5 | O16 <sup>9</sup>  | 2.017(4) |
| Fe2 | O7 <sup>1</sup>  | 1.981(5) | Fe5 | O23               | 1.928(5) |
| Fe2 | O7               | 1.981(5) | Fe5 | O24               | 2.050(6) |
| Fe2 | O9 <sup>4</sup>  | 2.032(4) | Fe6 | O15 <sup>8</sup>  | 2.029(4) |
| Fe2 | O9 <sup>5</sup>  | 2.032(4) | Fe6 | O15 <sup>9</sup>  | 2.029(4) |
| Fe2 | O19              | 1.852(4) | Fe6 | O18 <sup>7</sup>  | 2.007(4) |
| Fe2 | O20              | 2.141(6) | Fe6 | O18 <sup>4</sup>  | 2.007(4) |
| Fe3 | O10 <sup>4</sup> | 2.044(4) | Fe6 | O23               | 1.937(5) |
| Fe3 | O10 <sup>5</sup> | 2.044(4) | Fe6 | O25               | 2.044(7) |
| Fe3 | O11 <sup>2</sup> | 2.005(4) | O9  | Fe2 <sup>5</sup>  | 2.032(4) |
| Fe3 | O11 <sup>3</sup> | 2.005(4) | O10 | Fe3 <sup>5</sup>  | 2.044(4) |
| Fe3 | O19              | 1.897(5) | O11 | Fe3 <sup>10</sup> | 2.005(4) |
| Fe3 | O21              | 2.077(6) | O12 | Fe1 <sup>10</sup> | 2.109(4) |
| Fe4 | O14              | 2.013(4) | O15 | Fe6 <sup>11</sup> | 2.029(4) |
| Fe4 | O14 <sup>6</sup> | 2.013(4) | O16 | Fe5 <sup>11</sup> | 2.017(4) |
| Fe4 | O17 <sup>7</sup> | 2.006(5) | O17 | Fe4 <sup>7</sup>  | 2.006(5) |
| Fe4 | O17 <sup>4</sup> | 2.006(5) | O18 | Fe6 <sup>7</sup>  | 2.006(4) |

---

<sup>1</sup>+X,+Y,-Z; <sup>2</sup>1/2-X,1/2+Y,+Z; <sup>3</sup>1/2-X,1/2+Y,-Z; <sup>4</sup>1-X,1-Y,+Z; <sup>5</sup>1-X,1-Y,-Z; <sup>6</sup>+X,+Y,1-Z; <sup>7</sup>1-X,1-Y,1-Z;  
<sup>8</sup>1/2+X,1/2-Y,1-Z; <sup>9</sup>1/2+X,1/2-Y,+Z; <sup>10</sup>1/2-X,-1/2+Y,-Z; <sup>11</sup>-1/2+X,1/2-Y,+Z

## S7. The Crystal Images of HUST-5 and HUST-7

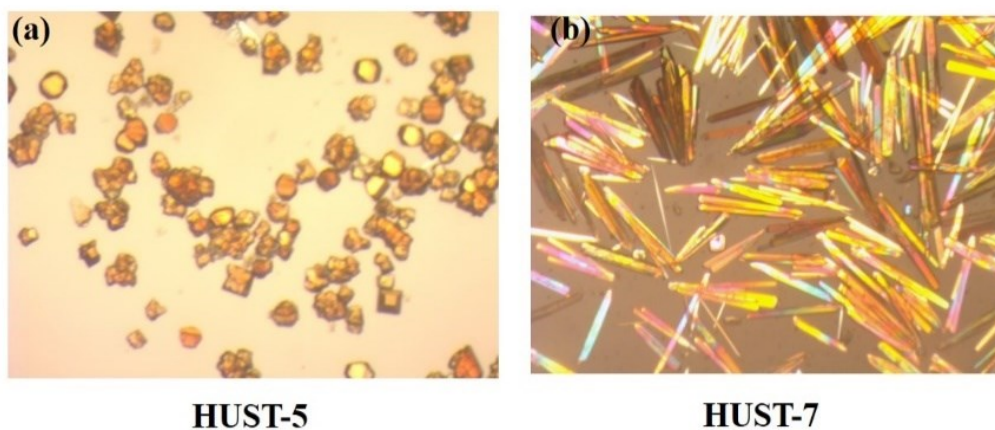

**Figure S1.** Optical microscopic photographs of HUST-5 (a) and HUST-7 (b).

### S8. The Crystal Structure of HUST-5 and HUST-7

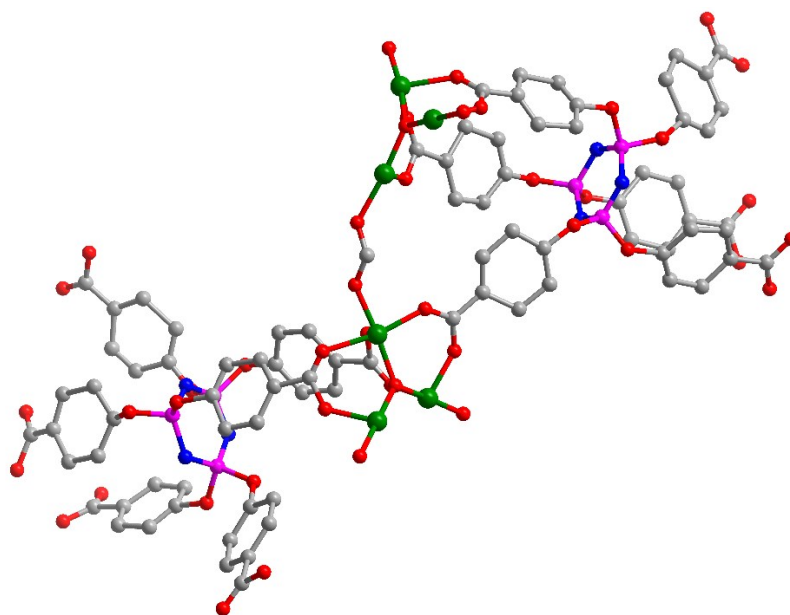

(a)

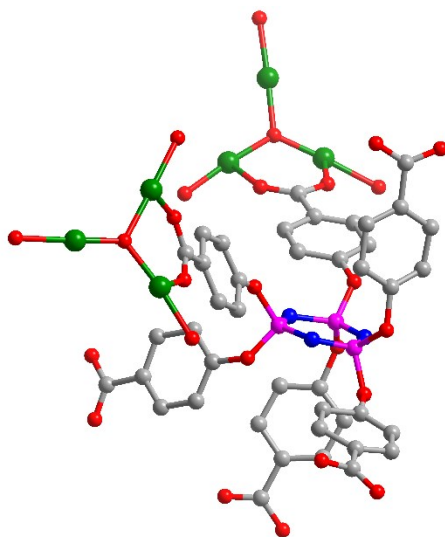

(b)

**Figure S2.** The asymmetric unit of HUST-5 and HUST-7.

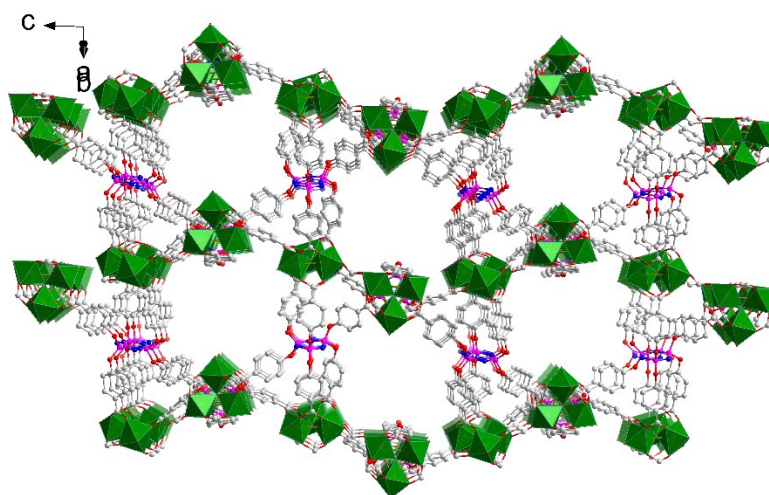

**Figure S3.** Partial view of two-dimensional channels of HUST-5.

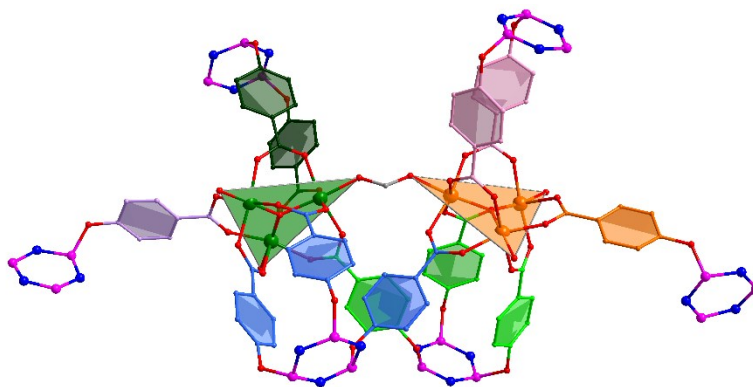

**Figure S4.** The coordination environment of hexa-nuclear clusters in HUST-5.

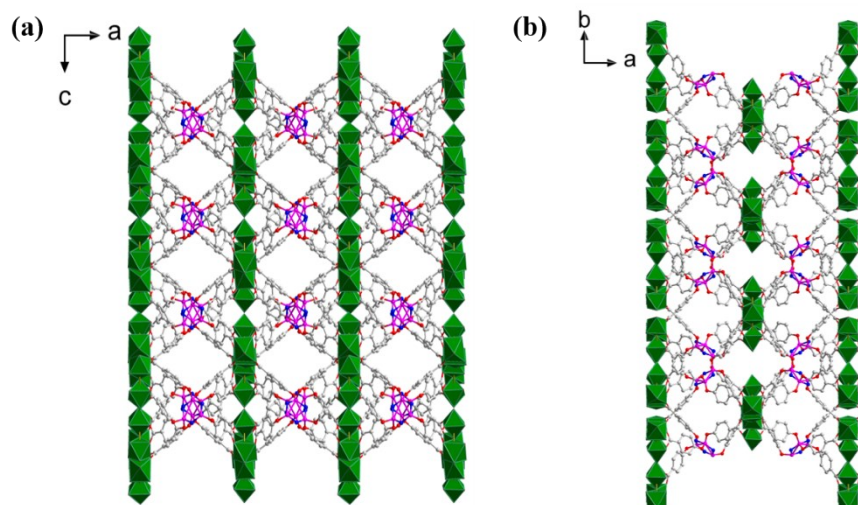

**Figure S5.** Partial view of 3D structure of HUST-7 along b axis (a) and c axis (b).

### S9. TGA Curves of HUST-5 and HUST-7

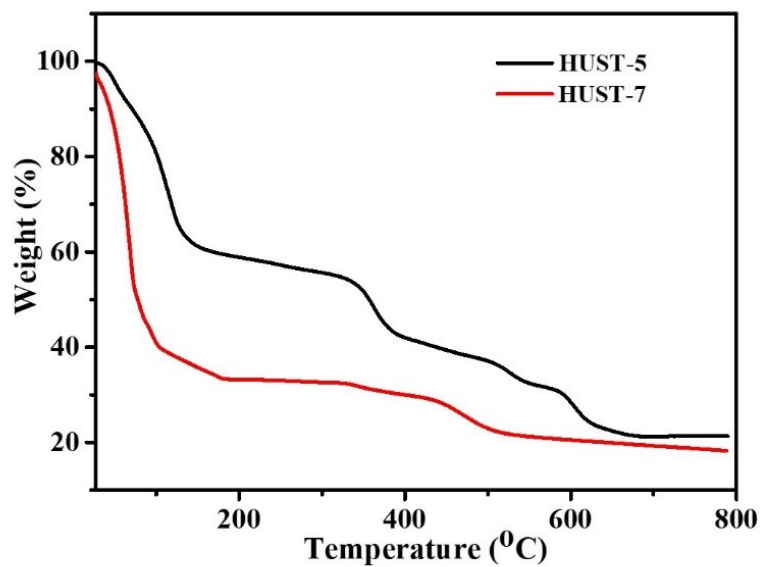

**Figure S6.** TGA curves of the as-prepared HUST-5 and HUST-7.

## S10. Powder X-ray Diffraction

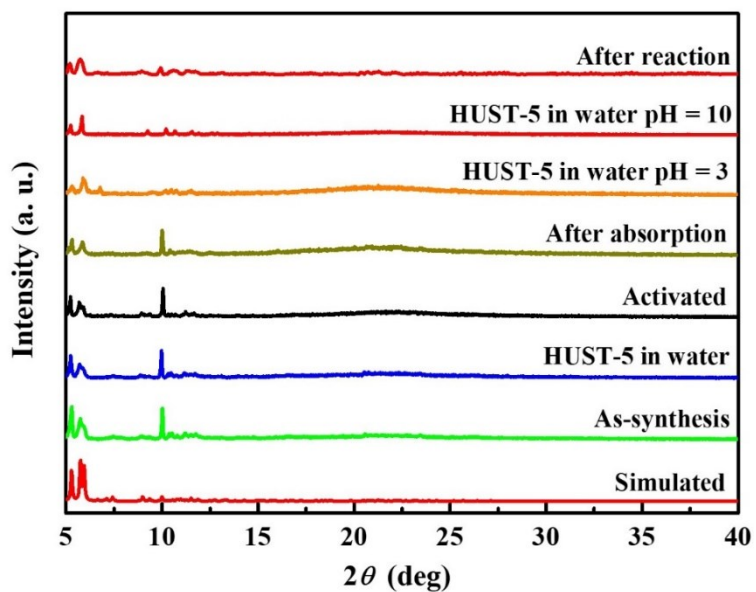

**Figure S7.** PXRD patterns of the simulated HUST-5 and as-synthesized HUST-5 under different conditions.

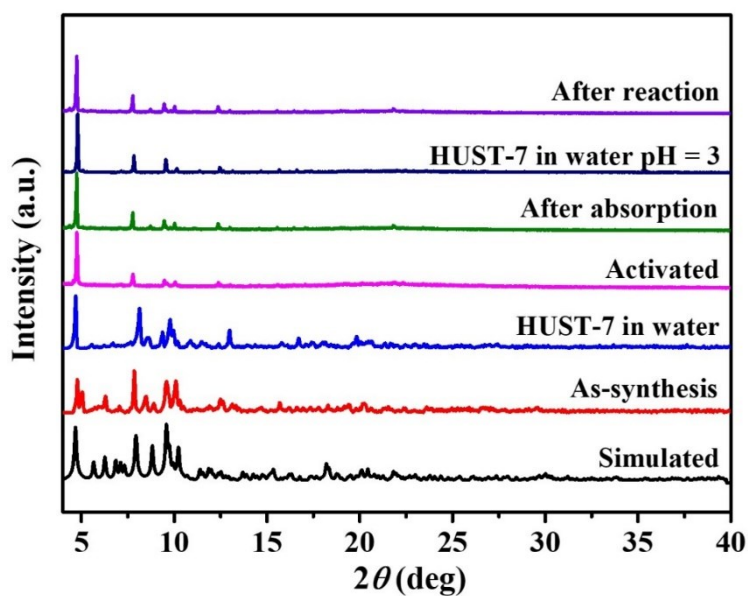

**Figure S8.** PXRD patterns of the simulated HUST-7 and as-synthesized HUST-7 under different conditions.



## **S11. Catalytic Activity Test and H<sub>2</sub>O<sub>2</sub> and AA Detection Procedures**

To examine the peroxidase-like activity, the catalytic oxidation of the peroxidase substrates in the presence of H<sub>2</sub>O<sub>2</sub> was conducted by Fe-MOFs, HUST-5 and HUST-7. The products were confirmed by scanning the UV-vis absorbance on spectrophotometer and the concentrations of products were calculated by their molar extinction coefficients at respective wavelengths (for oxTMB is 35800 M<sup>-1</sup>·cm<sup>-1</sup> at 661 nm; for oxOPD is 16300·M<sup>-1</sup> cm<sup>-1</sup> at 450 nm). For kinetic study of the single substrate reaction, we propose the reactions catalyzed by Fe-MOFs follow widely-accepted ping-pong mechanism. Lineweaver–Burk plot was employed for illustrating kinetic data and calculate the parameters by taking the reciprocal of both sides of the Michaelis–Menten equation.

$$\frac{1}{v} = \frac{K_m}{v_{max}[S]} + \frac{1}{v_{max}}$$

in which  $v$  and  $v_{max}$  are the initial reaction rate and the maximal reaction rate, respectively.  $[S]$  is the concentration of the substrate and  $K_m$  is the Michaelis-Menten constant.

### **Typical TMB Oxidation Procedure Catalyzed by Fe-MOFs**

In a typical assay, 80  $\mu$ L of Fe-MOFs dispersion (1 mg mL<sup>-1</sup>) were mixed in 1600  $\mu$ L of NaAc buffer solution (pH = 4.0), followed by adding 400  $\mu$ L of TMB solution (1 mM, ethanol solution). Then, 40  $\mu$ L of H<sub>2</sub>O<sub>2</sub> solution (4.2 mM) was added into the mixture. The mixed solution was incubated at 45 °C for 10 min for standard curve measurement.

### **Kinetic Measurements**

Kinetic measurements were carried out in time course mode by monitoring the



absorbance change at 660 nm or 450 nm. To investigate the mechanism, assays were carried out by varying concentrations of TMB or OPD at a fixed concentration of H<sub>2</sub>O<sub>2</sub> or vice versa.

For oxidation of TMB, NaAc buffer solution (pH = 4.0) was selected due to the favorable reaction condition. The concentrations of substrate varied from 0.3 mM to 1.8 mM along with a fixed amount of HUST-5 catalyst (0.038 mg mL<sup>-1</sup>) and hydrogen peroxide concentration of 99.7 mM. The reaction was carried out at 45 °C for 6 min and the content of oxTMB was assessed through the UV absorbance.

For oxidation of OPD, NaAc buffer solution (pH = 4.0) was selected due to the favorable reaction condition. The concentrations of substrate varied from 0.67 mM to 2.4 mM along with a fixed amount of HUST-5 catalyst (0.038 mg mL<sup>-1</sup>) and hydrogen peroxide concentration of 266 mM. The reaction was carried out at 45 °C for 6 min and the content of oxOPD was assessed through the UV absorbance.

### **Detection of H<sub>2</sub>O<sub>2</sub> using Fe-MOFs as peroxidase mimetics**

To investigate the peroxidase-like activity of the as-prepared Fe-MOFs, the catalytic oxidation of the peroxidase substrate TMB in the presence of H<sub>2</sub>O<sub>2</sub> was tested. The measurements were carried out by monitoring the absorbance change of oxTMB at 661 nm. In a typical experiment process, 80 μL of Fe-MOFs dispersion (1 mg mL<sup>-1</sup>) were mixed in 1600 μL of NaAc buffer solution (pH = 4.0), followed by adding 400 μL of TMB solution (1 mM, ethanol solution). Then, 10 μL of H<sub>2</sub>O<sub>2</sub> of various concentrations was added into the mixture. The mixed solution was incubated at 40 °C for 10 min for standard curve measurement.

### **Detection of ascorbic acid using Fe-MOFs by inhibiting the TMB oxidation**

Ascorbic acid detection was carried out as follows: 400 μL of TMB solution (1 mM, ethanol solution) and 20 μL AA of various concentrations was added into 1600 μL of NaAc buffer solution (pH = 4.0), followed by adding 80 μL of Fe-MOFs dispersion (1

mg mL<sup>-1</sup>). Then, 10 µL of H<sub>2</sub>O<sub>2</sub> (30 wt%) was added into the mixture. The mixture was incubated at 40 °C for 10 min. Then UV-Vis spectra measurements and photographs were taken.

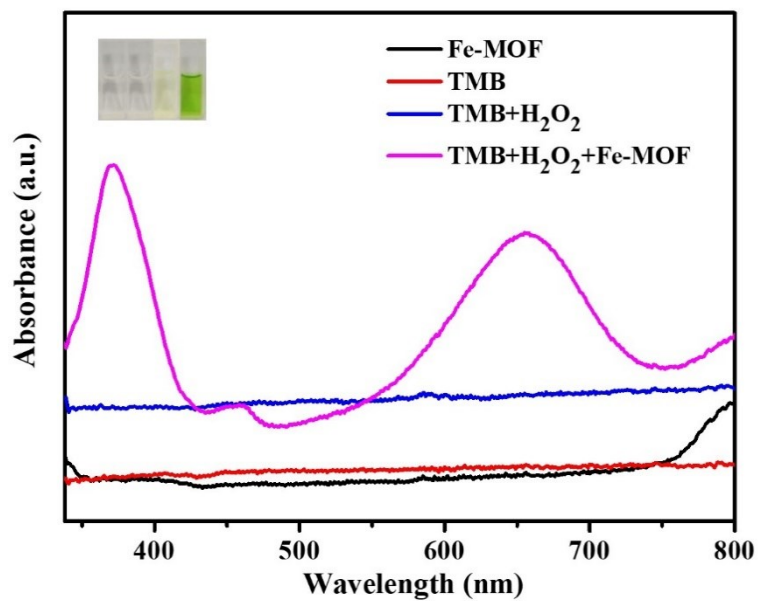

**Figure S9.** UV-vis adsorption spectra for TMB, TMB-H<sub>2</sub>O<sub>2</sub>, TMB-H<sub>2</sub>O<sub>2</sub>-Fe-MOF and Fe-MOF solutions in pH = 4.0 NaAc buffer solution.

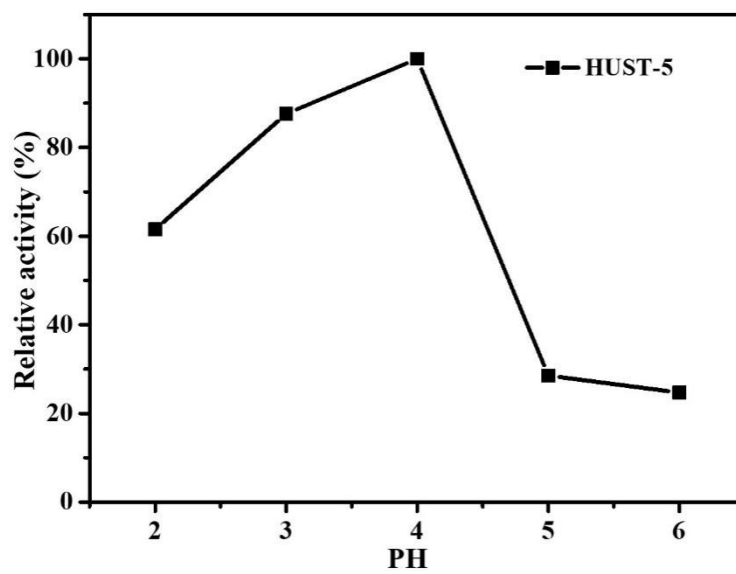

(a)

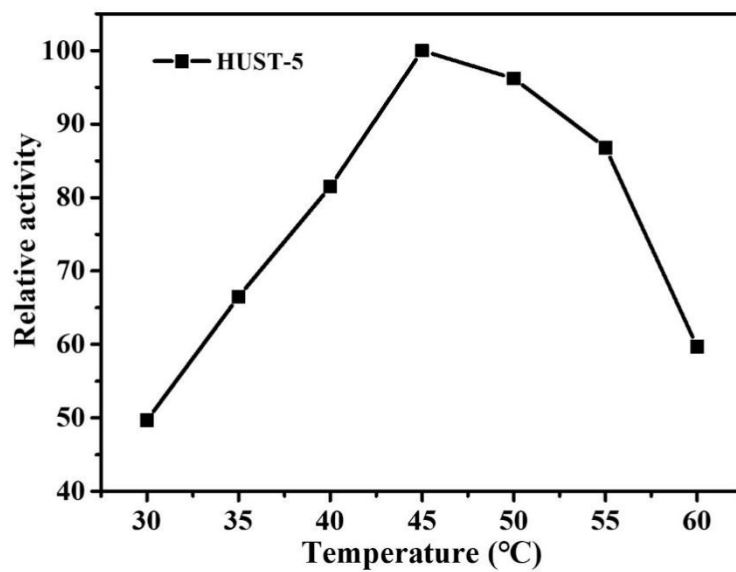

(b)

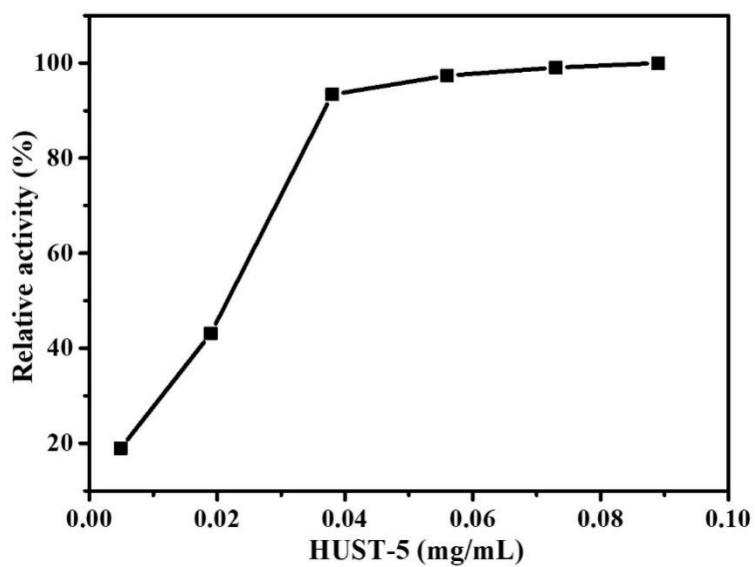

(c)

**Figure S10.** Peroxidase-like catalytic activity of HUST-5 against (a) pH value, (b) temperature, and (c) catalyst dosage. The maximum activity in each graph was set as 100%.

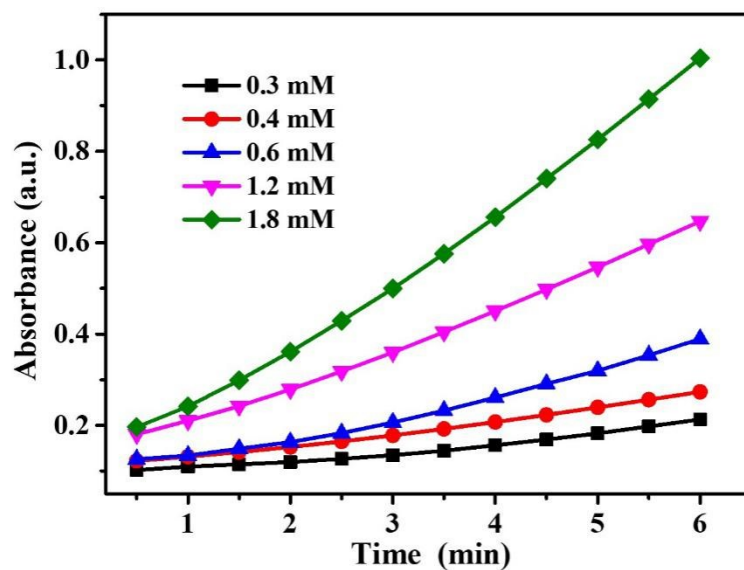

**Figure S11.** The time-dependent absorbance changes at 660 nm of various concentrations of TMB catalyzed by HUST-5.

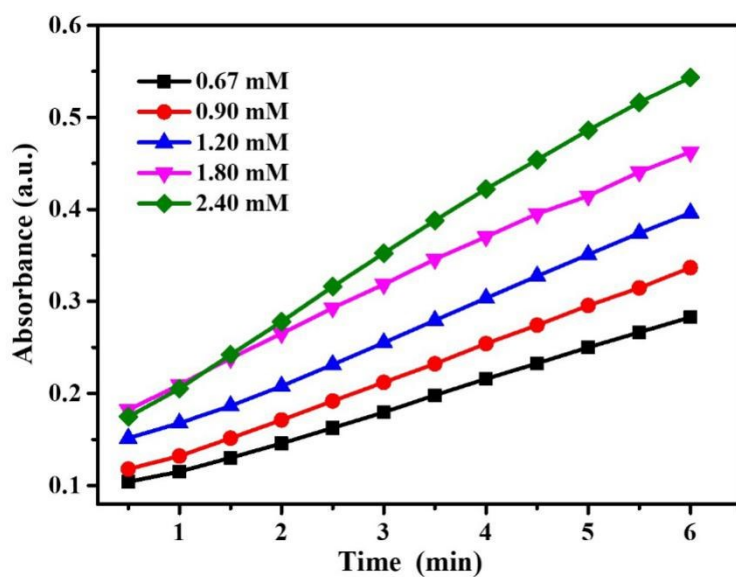

**Figure S12.** The time-dependent absorbance changes at 450 nm of various concentrations of OPD catalyzed by HUST-5.

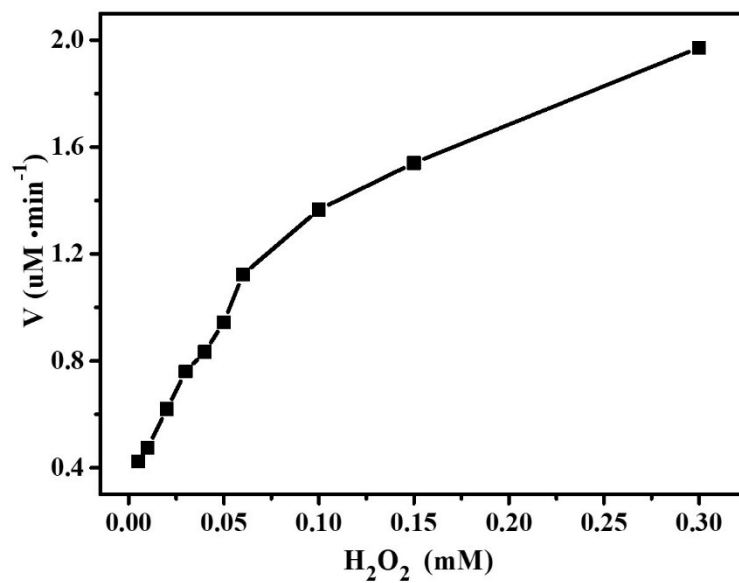

(a)

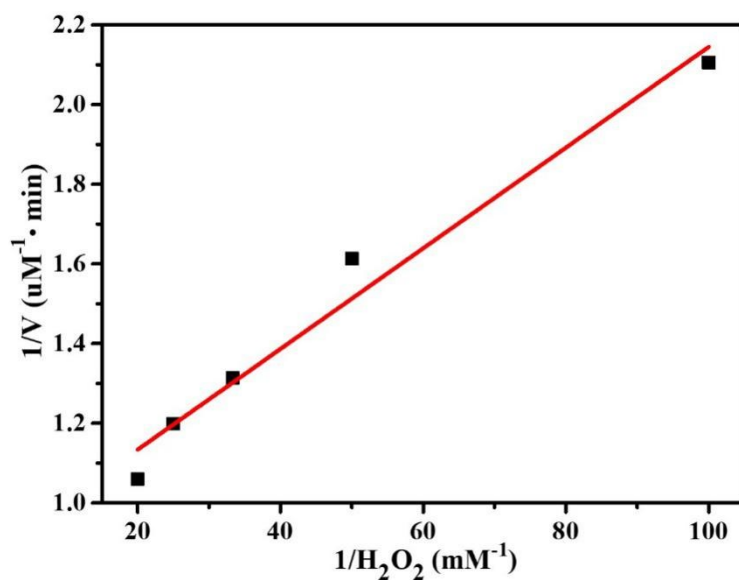

(b)

**Figure S13.** The velocity of the TMB oxidation reaction catalyzed by HUST-5. The concentrations of  $H_2O_2$  range from 5 to 300  $\mu M$ . (b) Double-reciprocal plots of the activity of HUST-5 at a fixed TMB concentration with different concentration of the second substrate  $H_2O_2$ .

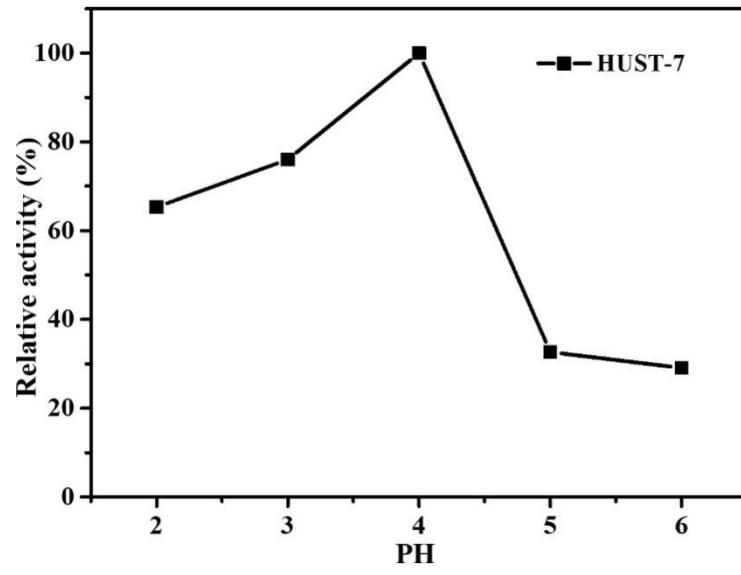

(a)

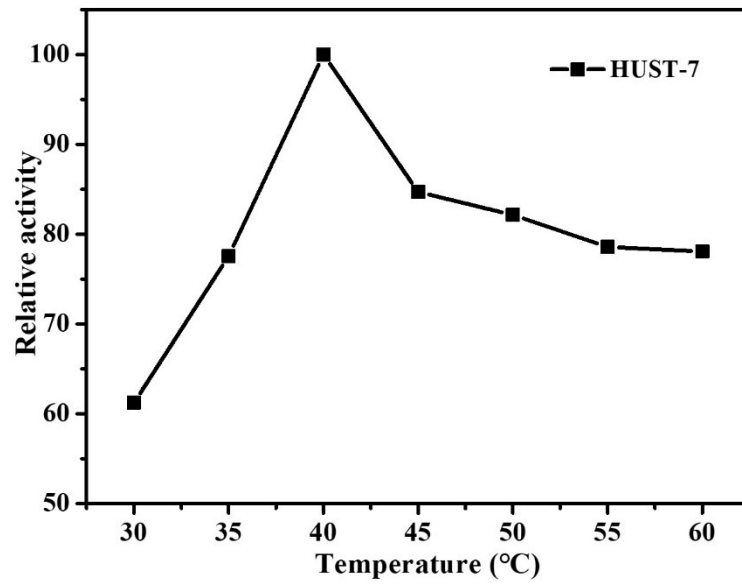

(b)

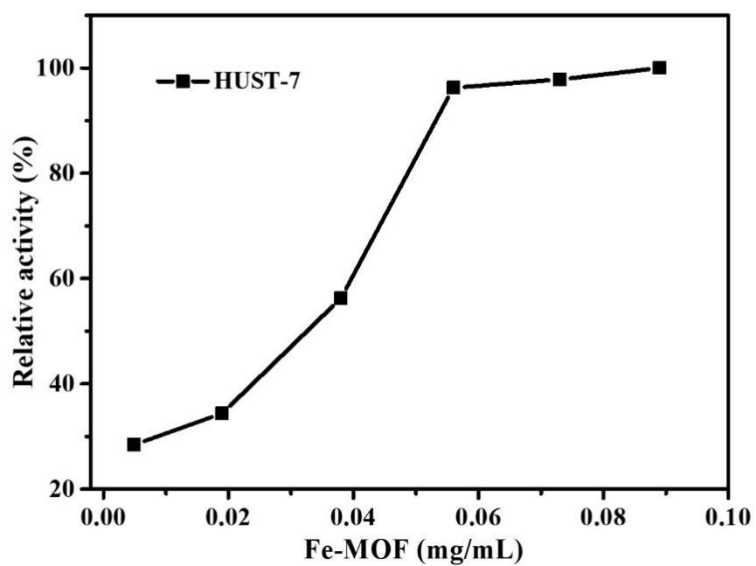

(c)

**Figure S14.** The Peroxidase-like catalytic activity of HUST-7 against (a) pH value, (b) temperature, and (c) catalyst dosage. The maximum activity in each graph was set as 100%.

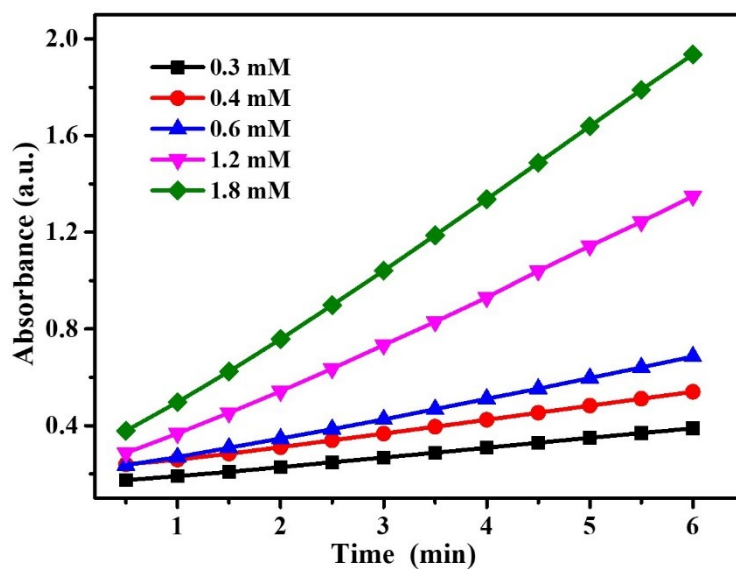

**Figure S15.** The time-dependent absorbance changes at 660 nm of various concentrations of TMB catalyzed by HUST-7.





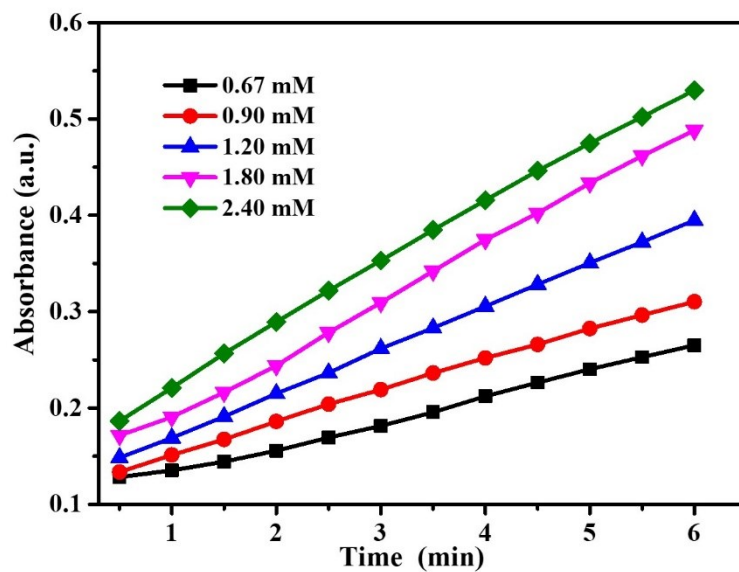

**Figure S16.** The time-dependent absorbance changes at 450 nm of various concentrations of OPD catalyzed by HUST-7.

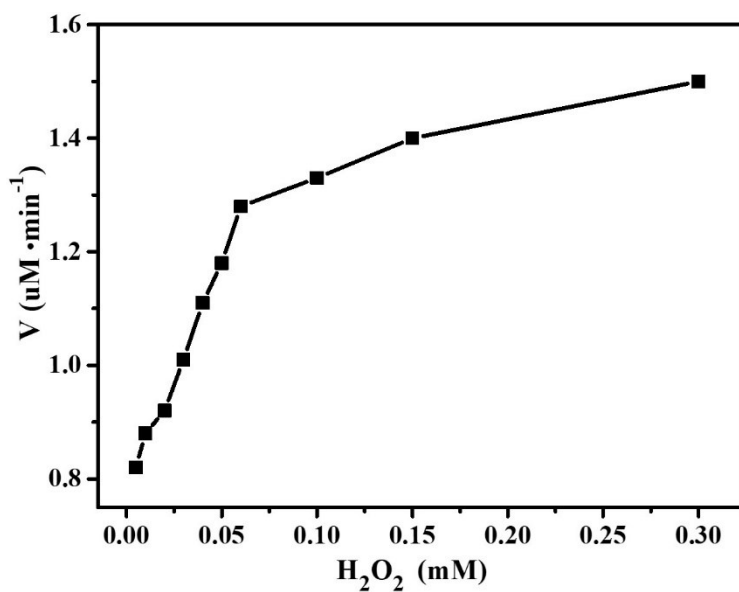

(a)

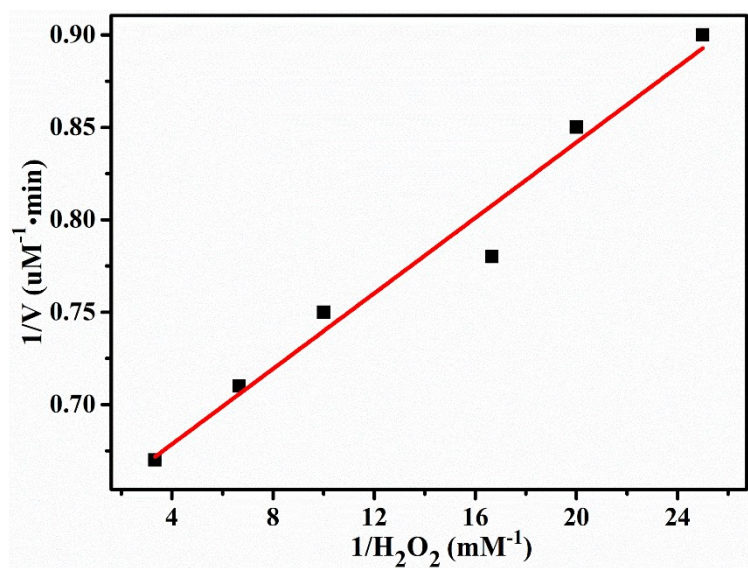

(b)

**Figure S17.** The velocity of the TMB oxidation reaction catalyzed by HUST-7. The concentrations of  $H_2O_2$  range from 5 to 300  $\mu M$ . (b) Double-reciprocal plots of the activity of HUST-7 at a fixed TMB concentration with different concentration of the second substrate  $H_2O_2$ .

**Table S4.** Apparent Michaelis–Menten constant ( $K_m$ ) and maximum reaction rate ( $V_{max}$ ) of Fe-MOFs and other materials.

| Catalyst   | Substrate fixed | Substrate varied | $K_m$ [mM] | $V_{max}$ [M s <sup>-1</sup> ] | Ref              |
|------------|-----------------|------------------|------------|--------------------------------|------------------|
| HUST-5     | TMB             | $H_2O_2$         | 0.014      | $1.89 \times 10^{-8}$          | <b>This work</b> |
|            | $H_2O_2$        | TMB              | 3.57       | $2.12 \times 10^{-7}$          |                  |
| HUST-7     | TMB             | $H_2O_2$         | 0.016      | $1.57 \times 10^{-8}$          | <b>This work</b> |
|            | $H_2O_2$        | TMB              | 4.9        | $5.27 \times 10^{-7}$          |                  |
| MIL-53(Fe) | TMB             | $H_2O_2$         | 0.04       | $1.86 \times 10^{-8}$          | 8                |

|                                     |                               |                               |        |                         |    |
|-------------------------------------|-------------------------------|-------------------------------|--------|-------------------------|----|
| MOF-808                             | H <sub>2</sub> O <sub>2</sub> | TMB                           | 1.08   | 8.78 × 10 <sup>-8</sup> | 9  |
|                                     | TMB                           | H <sub>2</sub> O <sub>2</sub> | 1.06   | 1.39 × 10 <sup>-8</sup> |    |
|                                     | H <sub>2</sub> O <sub>2</sub> | TMB                           | 0.0796 | 3.12 × 10 <sup>-8</sup> |    |
| HRP                                 | TMB                           | H <sub>2</sub> O <sub>2</sub> | 3.7    | 8.71 × 10 <sup>-8</sup> | 10 |
|                                     | H <sub>2</sub> O <sub>2</sub> | TMB                           | 0.434  | 1.00 × 10 <sup>-7</sup> |    |
| N-GODs                              | TMB                           | H <sub>2</sub> O <sub>2</sub> | 0.10   | 1.40 × 10 <sup>-7</sup> | 11 |
|                                     | H <sub>2</sub> O <sub>2</sub> | TMB                           | 11.19  | 3.80 × 10 <sup>-7</sup> |    |
| GO-COOH                             | TMB                           | H <sub>2</sub> O <sub>2</sub> | 3.9    | 3.85 × 10 <sup>-8</sup> | 12 |
|                                     | H <sub>2</sub> O <sub>2</sub> | TMB                           | 0.024  | 3.45 × 10 <sup>-8</sup> |    |
| H@M                                 | TMB                           | H <sub>2</sub> O <sub>2</sub> | 10.9   | 8.98 × 10 <sup>-8</sup> | 13 |
|                                     | H <sub>2</sub> O <sub>2</sub> | TMB                           | 0.068  | 6.07 × 10 <sup>-8</sup> |    |
| Fe <sub>3</sub> O <sub>4</sub> MNPs | TMB                           | H <sub>2</sub> O <sub>2</sub> | 154    | 9.78 × 10 <sup>-8</sup> | 14 |
|                                     | H <sub>2</sub> O <sub>2</sub> | TMB                           | 0.098  | 3.44 × 10 <sup>-8</sup> |    |

**Table S5.** Comparison of the sensing parameters among MOF-Based peroxidase mimics for their colorimetric sensing of H<sub>2</sub>O<sub>2</sub> and AA.

| Peroxidase mimic | Analyte                       | Linear range (μM) | Detection limit (μM) | Ref              |
|------------------|-------------------------------|-------------------|----------------------|------------------|
| HUST-5           | H <sub>2</sub> O <sub>2</sub> | 5-50              | 1.84                 | <b>This work</b> |
| HUST-7           | H <sub>2</sub> O <sub>2</sub> | 5-50              | 4.26                 | <b>This work</b> |
| MIL-53(Fe)       | H <sub>2</sub> O <sub>2</sub> | 0.95-19           | 0.13                 | 8                |
| MOF-808          | H <sub>2</sub> O <sub>2</sub> | 10-15000          | 4.5                  | 9                |

|                                                                                                                |                               |              |       |                  |
|----------------------------------------------------------------------------------------------------------------|-------------------------------|--------------|-------|------------------|
| Cu <sub>6</sub> (Trz) <sub>10</sub> (H <sub>2</sub> O) <sub>4</sub> [H<br>2SiW <sub>12</sub> O <sub>40</sub> ] | H <sub>2</sub> O <sub>2</sub> | 10–50        | 1.37  | 15               |
| MIL-68(Fe)                                                                                                     | H <sub>2</sub> O <sub>2</sub> | 3–40         | 0.256 | 16               |
| MIL-100(Fe)                                                                                                    | H <sub>2</sub> O <sub>2</sub> | 3–40         | 0.155 | 16               |
| HUST-5                                                                                                         | AA                            | 37.91–341.23 | 12.11 | <b>This work</b> |
| HUST-6                                                                                                         | AA                            | 37.91–341.23 | 15.92 | <b>This work</b> |
| MIL-53(Fe)                                                                                                     | AA                            | 28.6–190.5   | 15    | 8                |
| MOF-808                                                                                                        | AA                            | 30–1030      | 15    | 9                |
| MIL-68(Fe)                                                                                                     | AA                            | 30–485       | 6     | 16               |
| MIL-100(Fe)                                                                                                    | AA                            | 30–485       | 6     | 16               |

---

## References

- [1] F. Yu, B. Q Hu, X. Wang, Y. Zhao, J. Li, B. Li and H. Zhou, *J. Mater. Chem. A*, 2020, **8**, 2083-2089.
- [2] (a) B. Delley, *J. Chem. Phys.*, 1990, **92**, 508-517; (b) B. Delley, *J. Chem. Phys.*, 1991, **94**, 7245-7250; (c) B. Delley, *J. Chem. Phys.*, 2000, **113**, 7756-7764.
- [3] H. J. Monkhorst and J. D. Pack, *Phys. Rev. B*, 1976, **13**, 5188-5192.
- [4] J. P. Perdew, K. Burke and M. Ernzerhof, *Phys. Rev. Lett.*, 1996, **77**, 3865-3868.
- [5] Y. Inada and H. orita, *J. Comput. Chem.*, 2008, **29**, 225-232.
- [6] M. Dolg, U. Wedig, H. Stoll and H. Preuss, *J. Chem. Phys.*, 1987, **86**, 866-872.
- [7] S. Grimme, *J. Comput. Chem.*, 2006, **27**, 1787-1799.

- [8] L. Ai, L. Li, C. Zhang, J. Fu and J. Jiang, *Chem. -Eur. J.*, 2013, **19**, 15105-15108.
- [9] H. Zheng, C. Liu, X. Zeng, J. Chen, J. Lü, R. Lin, R. Cao, Z. Lin and J. Su, *Inorg. Chem.*, 2018, **57**, 9096-9104.
- [10] M. Liu, H. Zhao, S. Chen, H. Yu and X. Quan, *ACS Nano.*, 2012, **6**, 3142-3151.
- [11] L. Lin, X. Song, Y. Chen, M. Rong, T. Zhao, Y. Wang, Y. Jiang and X. Chen, *Anal. Chim. Acta.*, 2015, **869**, 89-95.
- [12] Y. Song, K. Qu, C. Zhao, J. Ren and X. Qu, *Adv. Mater.*, 2010, **22**, 2206-2210.
- [13] F. Qin, S. Jia, F. Wang, S. Wu, J. Song and Y. Liu, *Catal. Sci. Technol.*, 2013, **3**, 2761-2768.
- [14] L. Su, J. Feng, X. Zhou, C. Ren, H. Li and X. Chen, *Anal. Chem.*, 2012, **84**, 5753-5758.
- [15] E. Zhou, C. Qin, P. Huang, X. Wang, W. Chen, K. Shao and Z. Su, *Chem. -Eur. J.*, 2015, **21**, 11894-11898.
- [16] J. Zhang, H. Zhang, Z. Du, X. Wang, S. Yu and H. Jiang, *Chem. Commun.*, 2014, **50**, 1092-1094.
